# Supplementary material for: T cells use focal adhesions to pull themselves through confined environments
Source: PubMed Central journal article supplement — J Cell Biol. 2024 Jun 18;223(10):e202310067. doi: 10.1083/jcb.202310067 (PMC11187980; doi:10.1083/jcb.202310067), 2024-06-18

Data in Fig. S2A

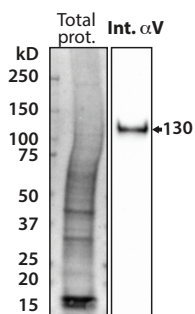

Total protein stain - Amido black  
Right after gel transfer. before antibody staining

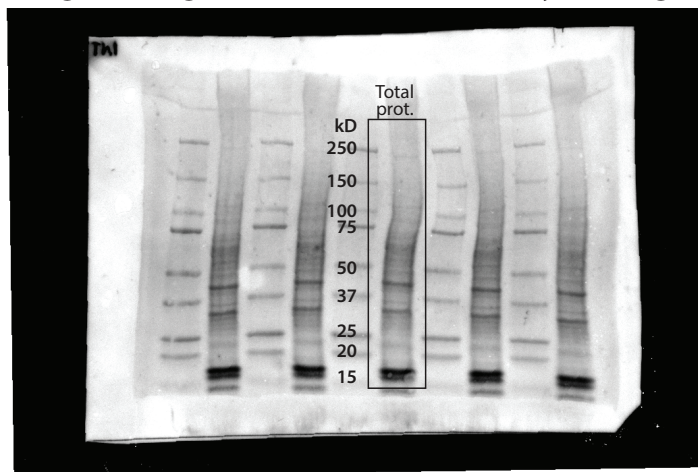

Membrane before exposition,  
after antibody staining

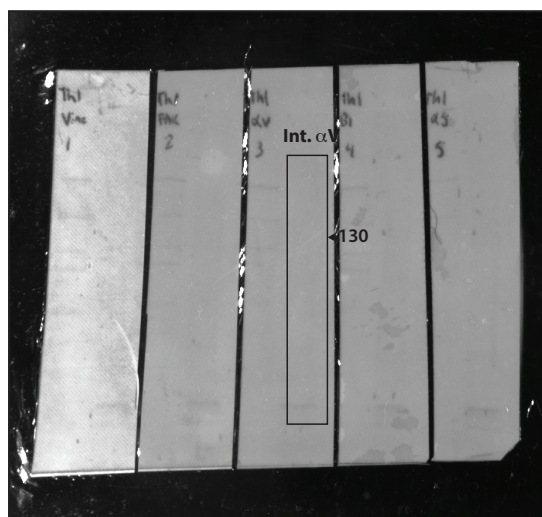

Chemiluminescence

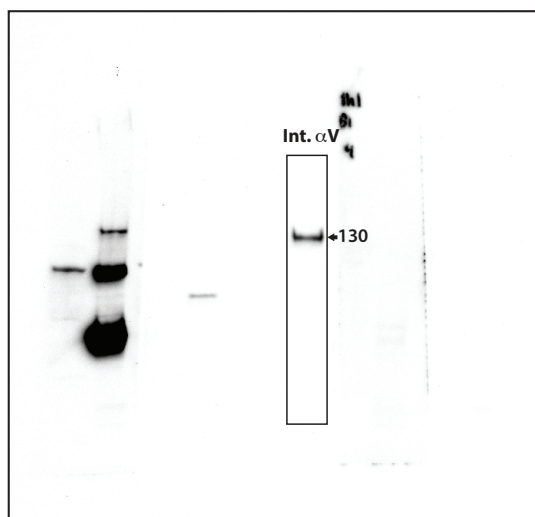

Data in Fig. S2A

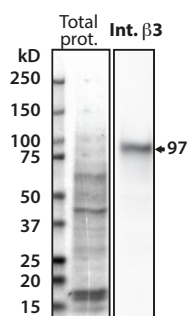

Total protein stain - Amido black  
Right after gel transfer. before antibody staining

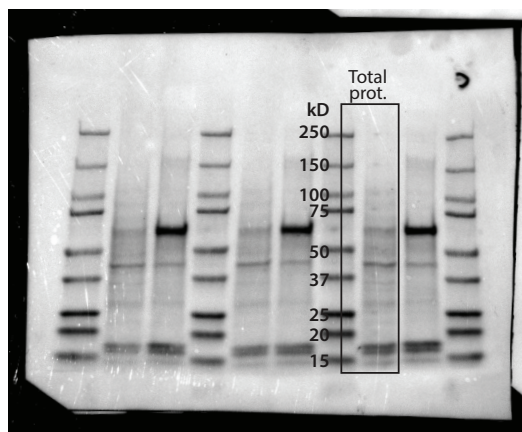

Membrane before exposition,  
after antibody staining

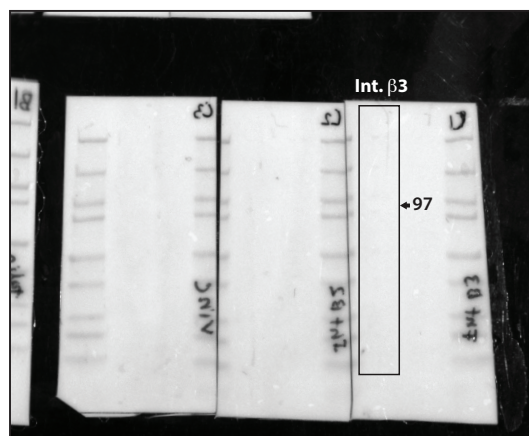

Chemiluminescence

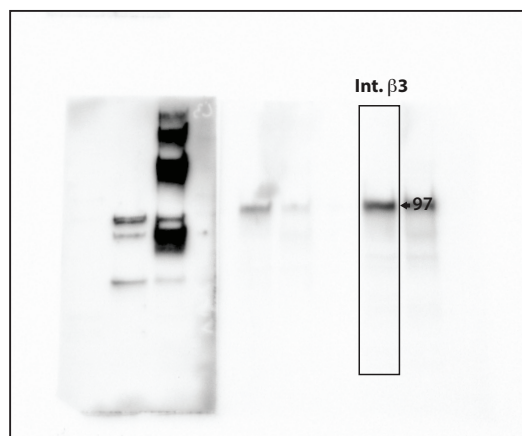

Data in Fig. S2A

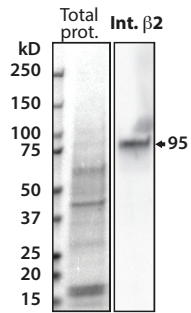

Total protein stain - Amido black  
Right after gel transfer. before antibody staining

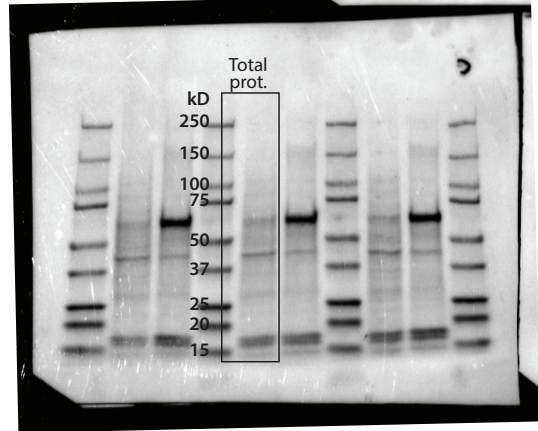

Membrane before exposition,  
after antibody staining

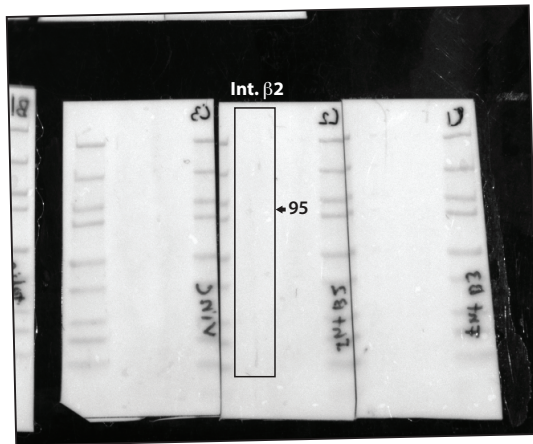

Chemiluminescence

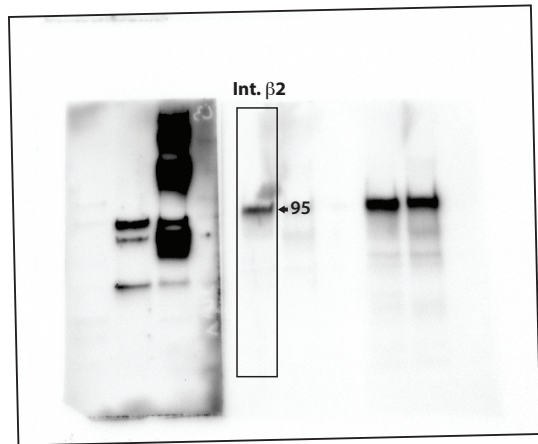

Data in Fig. S2A

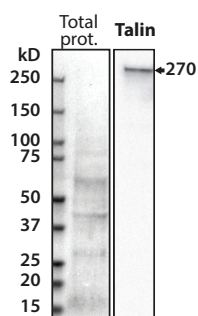

Total protein stain - Amido black  
Right after gel transfer. before antibody staining

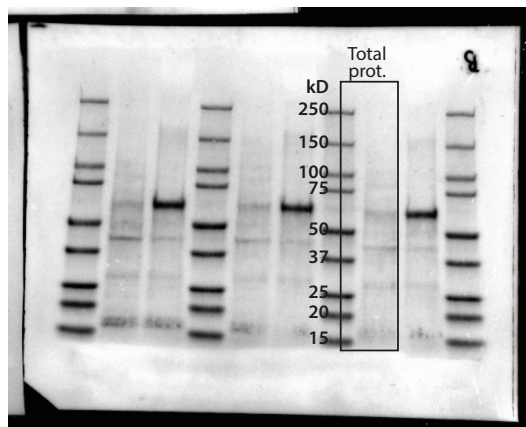

Membrane before exposition,  
after antibody staining

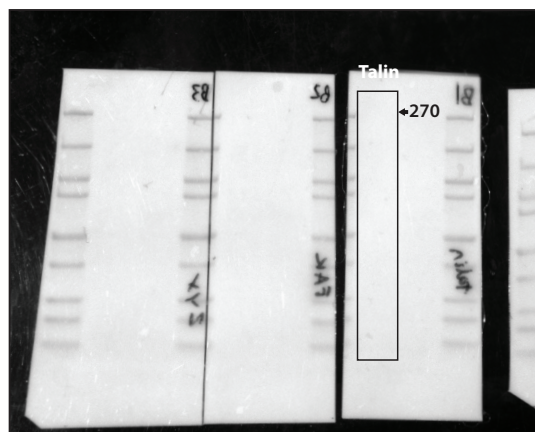

Chemiluminescence

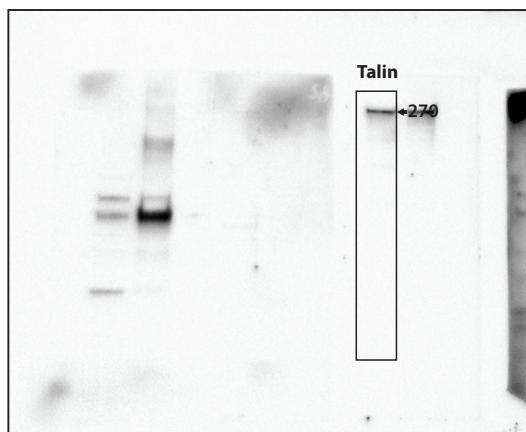

Data in Fig. S2A

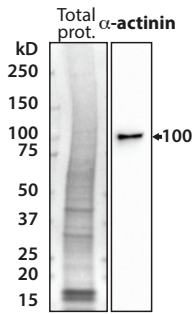

Total protein stain - Amido black  
Right after gel transfer. before antibody staining

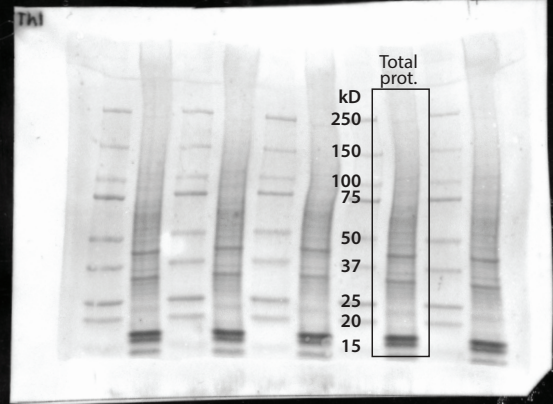

1st blotting- Membrane before exposition,  
after antibody staining (for Integrin- $\beta$ 1)

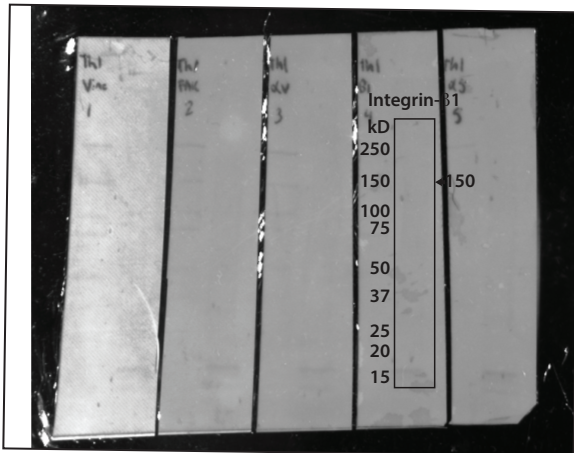

1st blotting-Chemiluminescence  
\*No signal\*

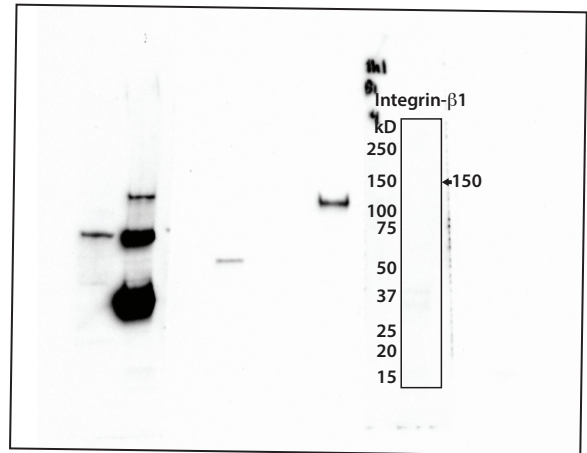

Reblotting- Membrane before exposition,  
after stripping and antibody staining

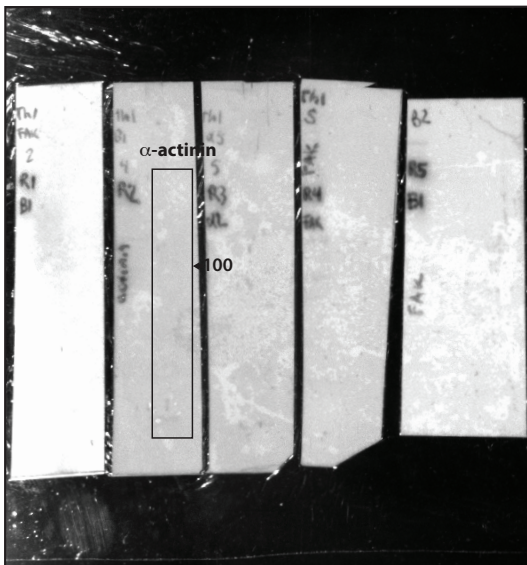

Reblotting-Chemiluminescence

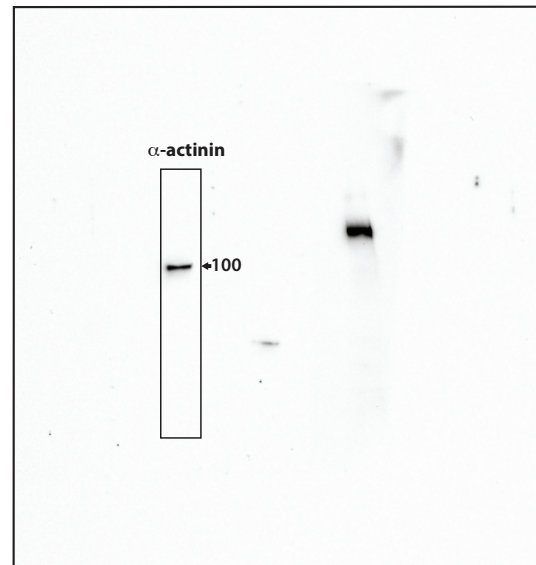

Data in Fig. S2A

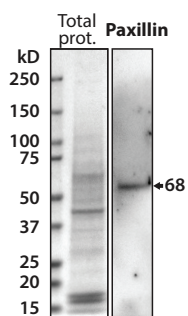

Total protein stain - Amido black  
Right after gel transfer. before antibody staining

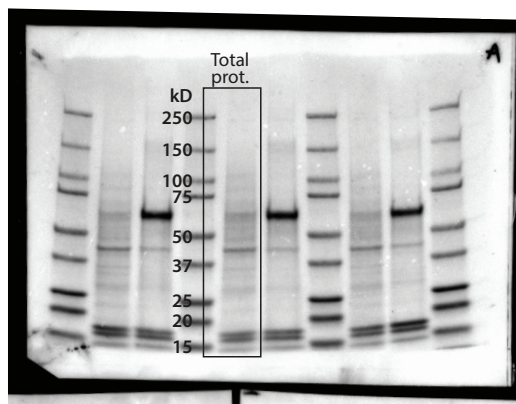

Membrane before exposition,  
after antibody staining

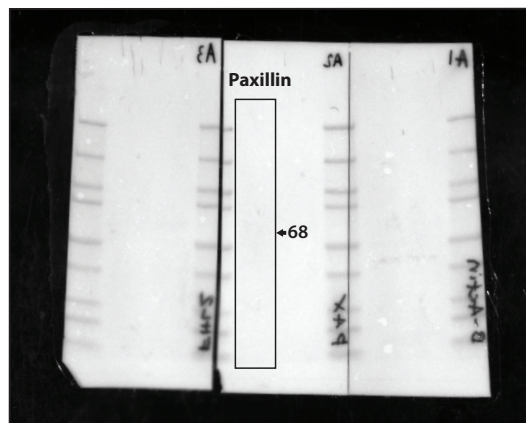

Chemiluminescence

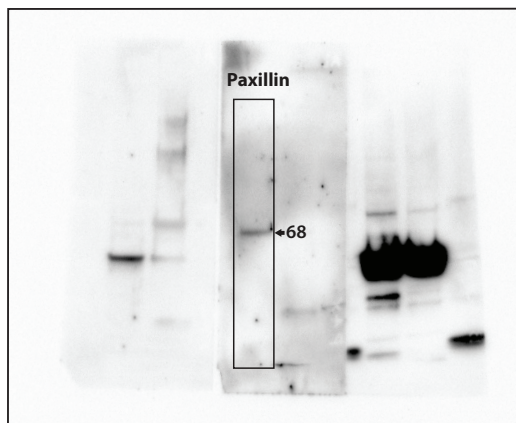

Data in Fig. S2A

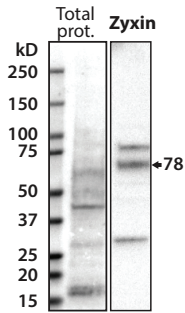

Total protein stain - Amido black  
Right after gel transfer. before antibody staining

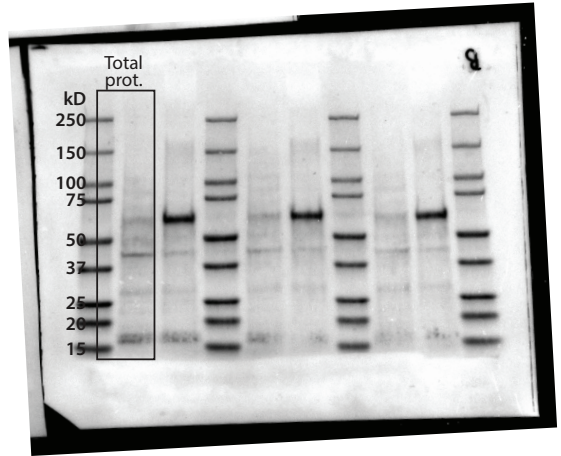

Membrane before exposition,  
after antibody staining

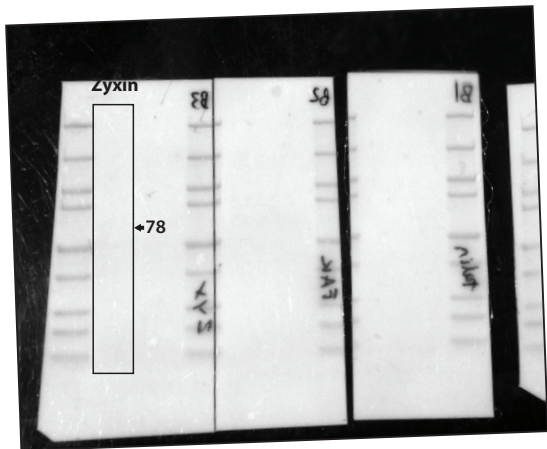

Chemiluminescence

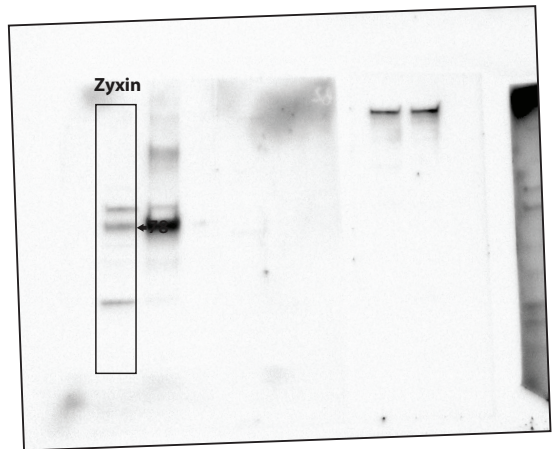

Data in Fig. S2A

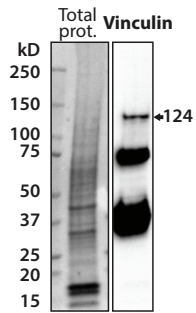

Total protein stain - Amido black  
Right after gel transfer. before antibody staining

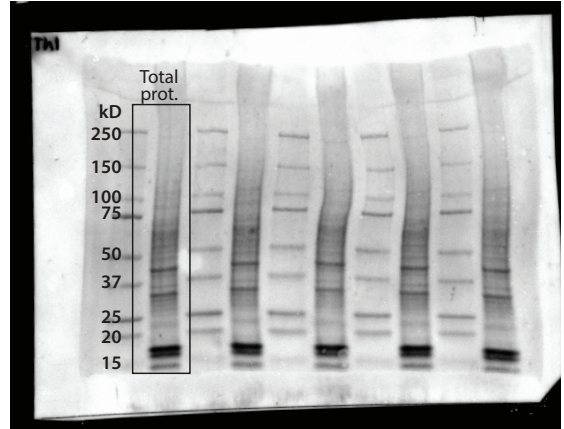

Membrane before exposition,  
after antibody staining

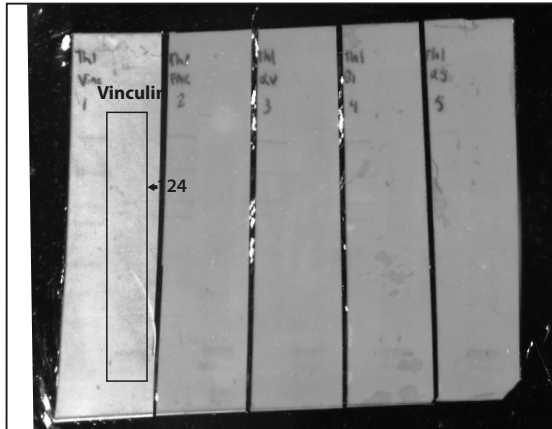

Chemiluminescence

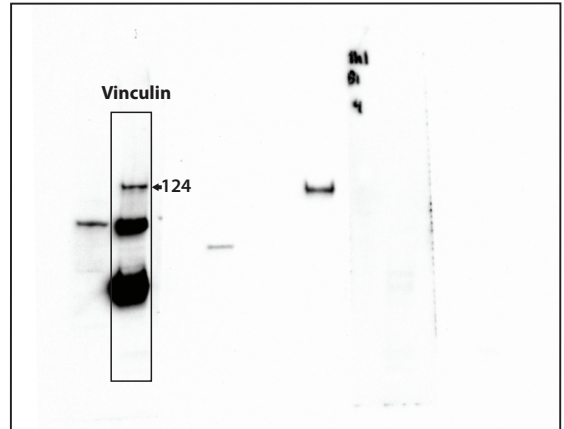

Supplement: JCB_202310067_SourceDataFS2.pdf [file JCB_202310067_SourceDataFS2.pdf]
